# Supplementary material for: Stretchable and Flexible Painted Thermoelectric Generators on Japanese Paper Using Inks Dispersed with P- and N-Type Single-Walled Carbon Nanotubes
Source: MDPI journal article supplement (doi:10.3390/s24092946), 2024-05-06
Supplement: s1 [file s1]

# **Stretchable and Flexible Painted Thermoelectric Generators on Japanese Paper Using Inks Dispersed with P- and N-Type Single-Walled Carbon Nanotubes**

**Takumi Nakajima, Koki Hoshino, Hisatoshi Yamamoto, Keisuke Kaneko, Yutaro Okano and Masayuki Takashiri \***

Department of Materials Science, Tokai University, 4-1-1 Kitakaname, Hiratsuka, Kanagawa 259-1292, Japan

\* Correspondence: takashiri@tokai.ac.jp

## Supplementary Information

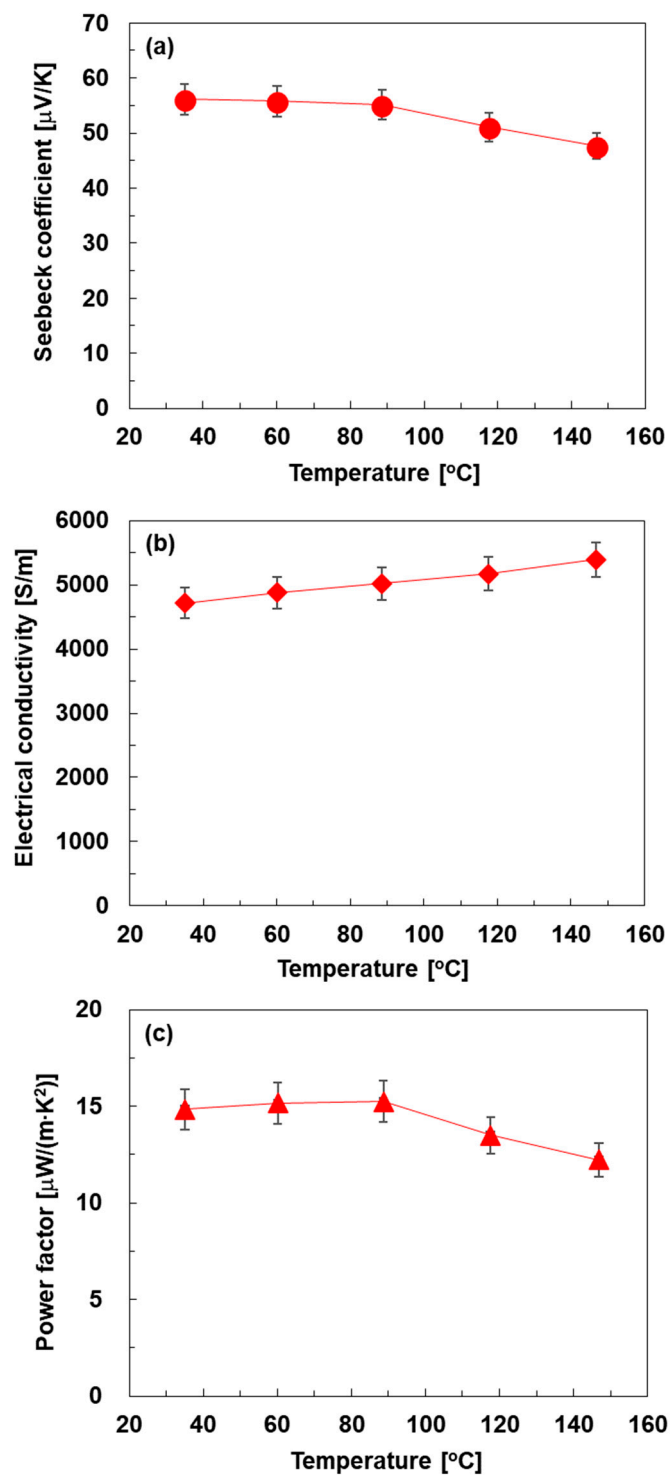

Figure S1: Temperature dependence of the in-plane thermoelectric properties of surfactant-free SWCNT films. (a) Seebeck coefficient, (b) electrical conductivity, and (c) power factor.

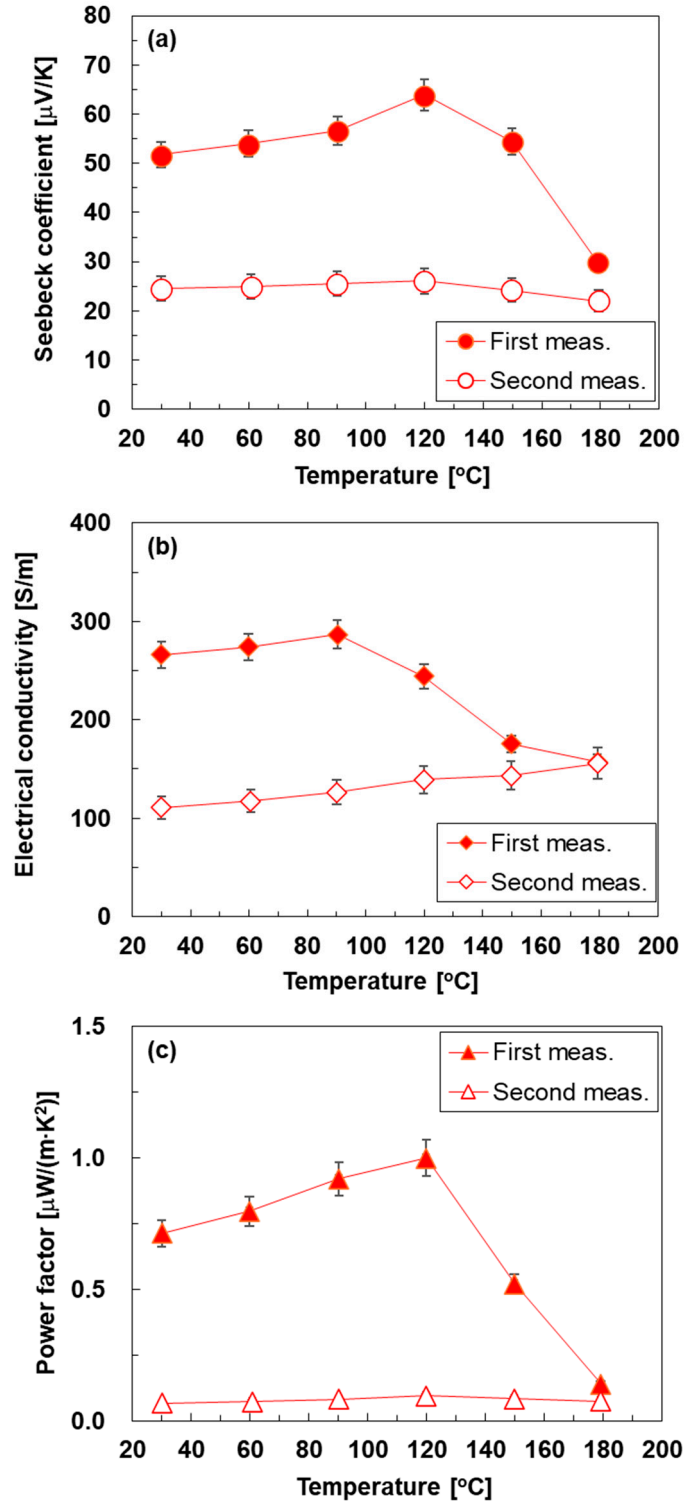

Figure S2: Temperature dependence of in-plane thermoelectric properties of p-type SWCNT layers (reproducibility measurement). (a) Seebeck coefficient, (b) electrical conductivity, and (c) power factor.
